# Supplementary material
Source: PubMed Central journal article supplement (PMC10203132)
Supplement: 41467_2023_38573_MOESM1_ESM.pdf [file 41467_2023_38573_MOESM1_ESM.pdf]

## Supplementary Information

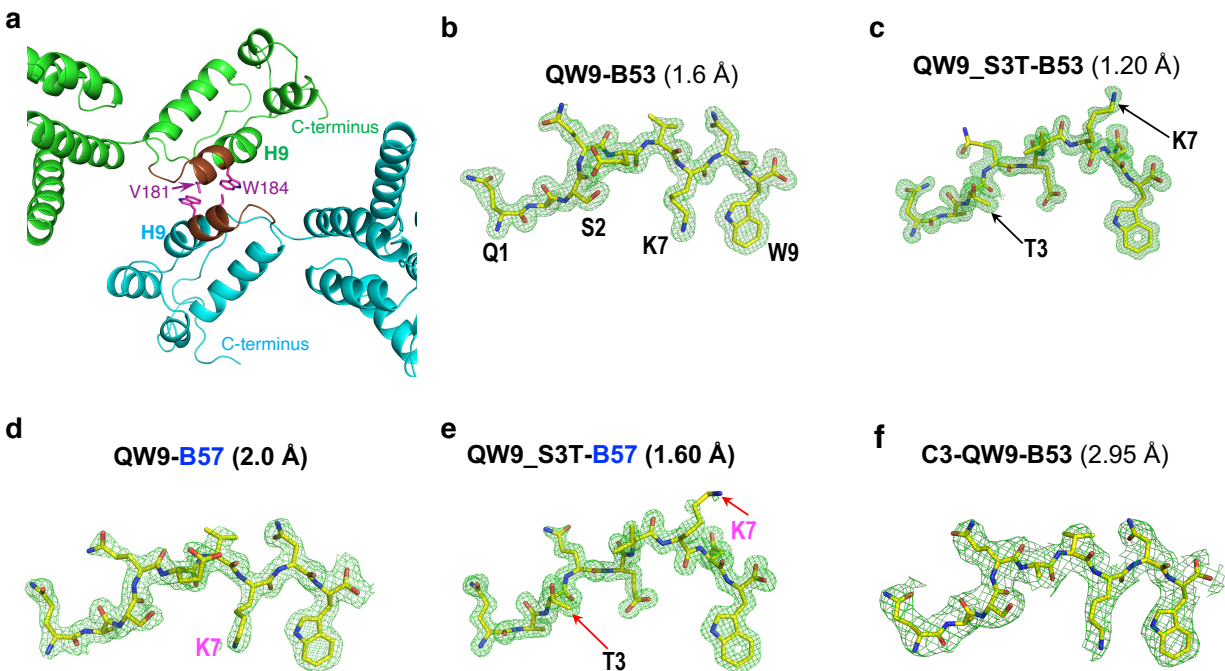

### Supplementary Figure 1. Highly networked epitope QW9 presented by B53 and B57

**a**, The location of QW9 (colored in purple) in the assembled HIV-1 capsid protein Gag p24 (PDB: 3J4F). Two p24 protomers packed along a pseudo-dyad between two hexamers are shown in green and cyan ribbons, respectively. Residues V6<sup>QW9</sup> and W9<sup>QW9</sup> located at the p24 H9 helix are colored in purple. **b-f**, The electron density maps of QW9 and QW9\_S3T in B53, B57 and C3-QW9-B53 structures. The map is shown as green mesh (2mFo-DFc, contoured at 1.2σ).

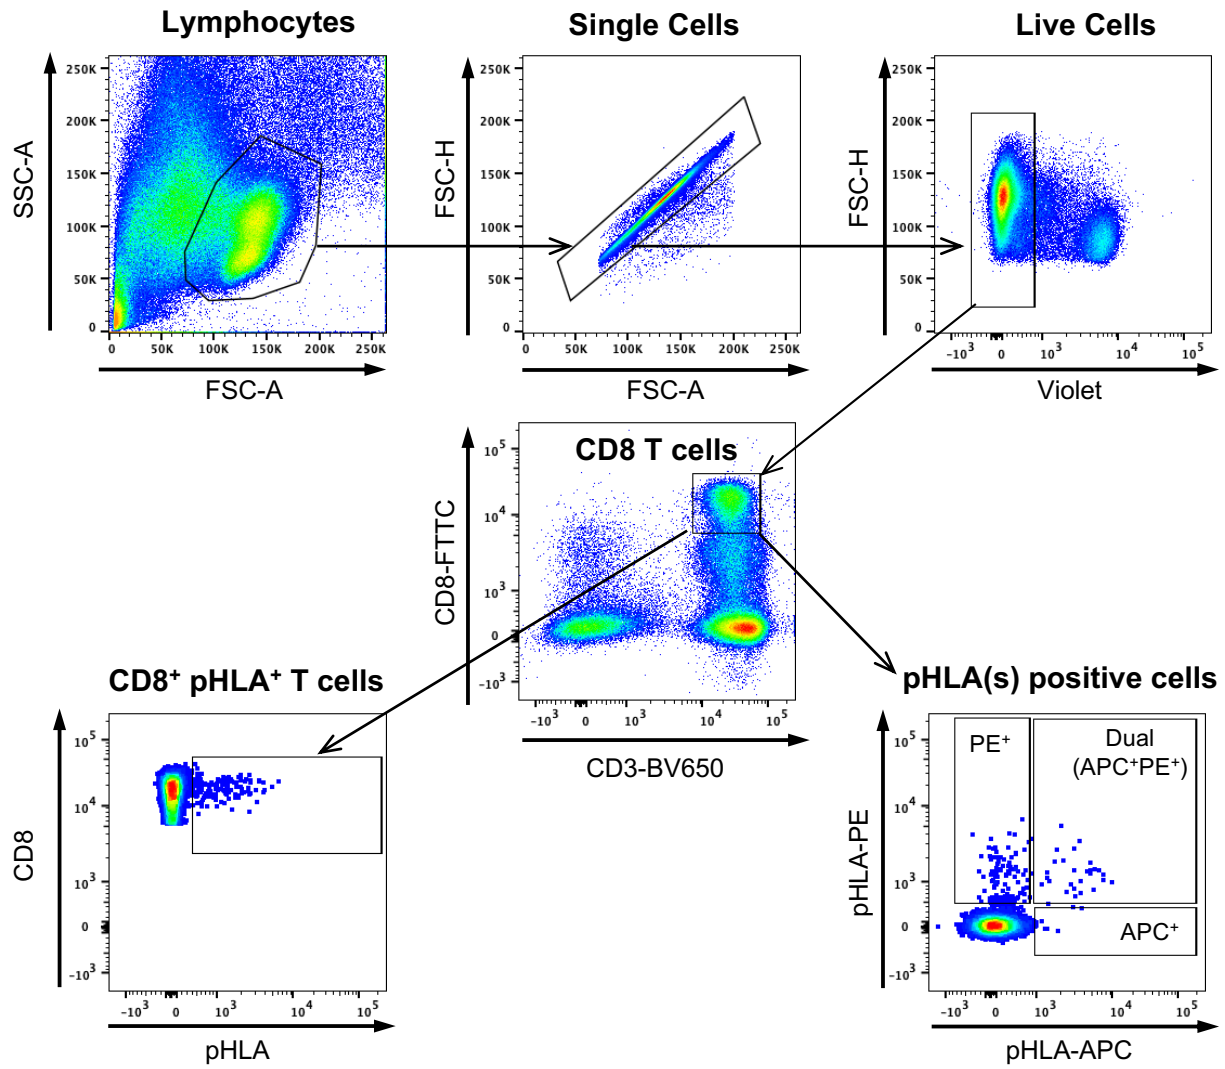

Supplementary Figure 2. Flow cytometry gating strategy for tetramer staining assays

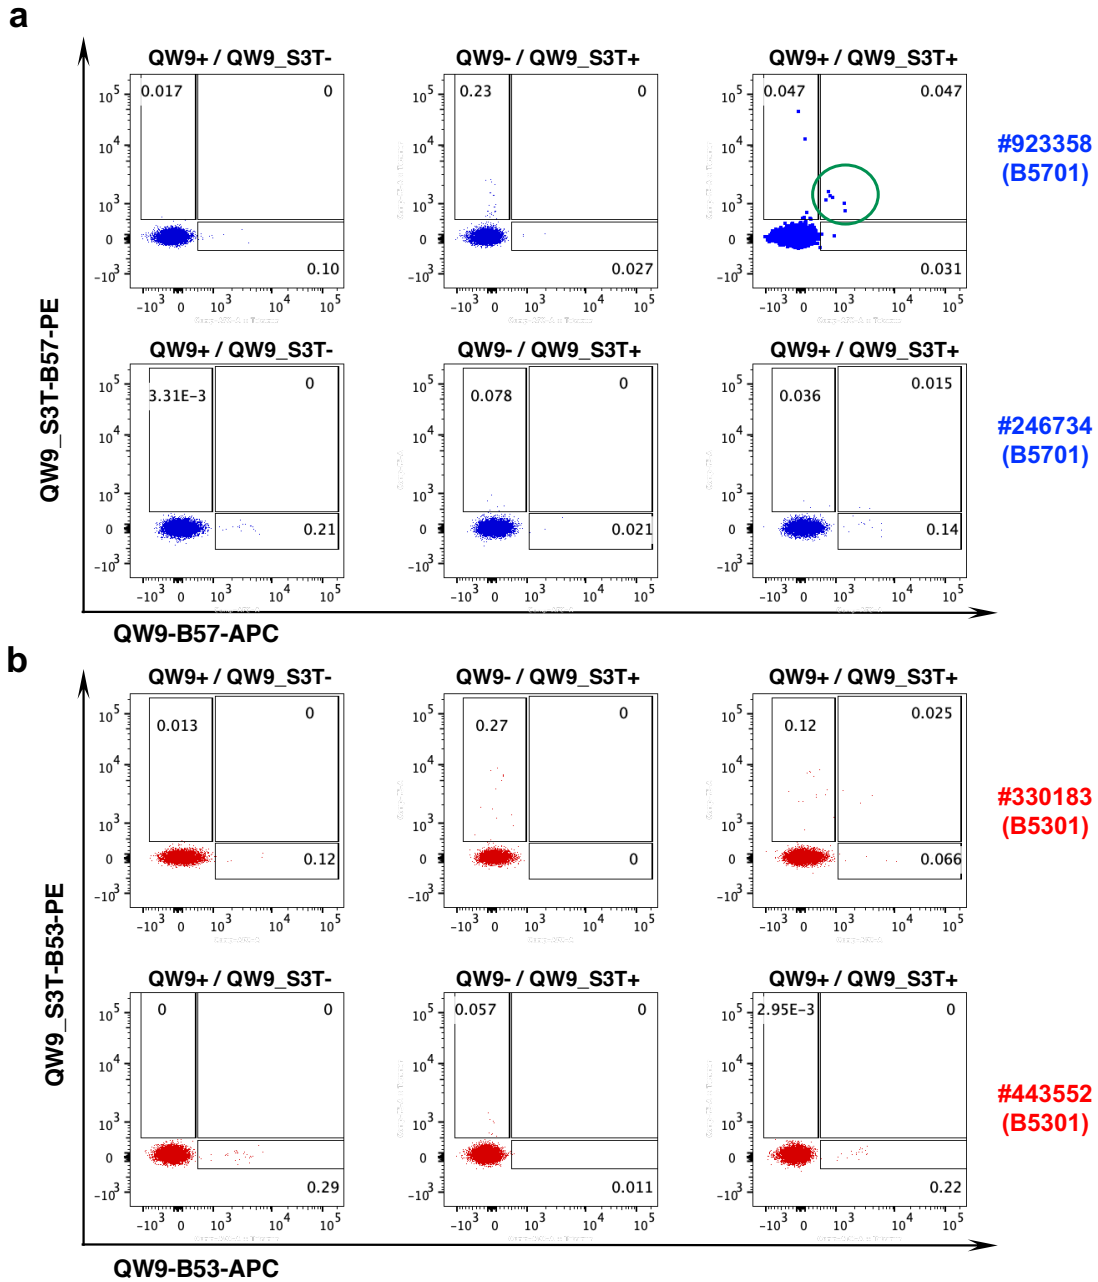

**Supplementary Figure 3. Tetramer staining for additional B57<sup>+</sup> and B53<sup>+</sup> individuals**

**a, b**, Representatives of tetramer-specific CTLs quantitation for B57<sup>+</sup> (blue) and B53<sup>+</sup> (red) individuals by flow cytometry (duplicate number: n=3). Columns left to right show QW9 tetramer, QW9\_S3T tetramer, and dual tetramer staining. Rows depict individual subjects expressing B57 or B53, as indicated. Convincing dual QW9+/QW9\_S3T+ tetramer staining population from a B57<sup>+</sup> individual is highlighted in the green circle.

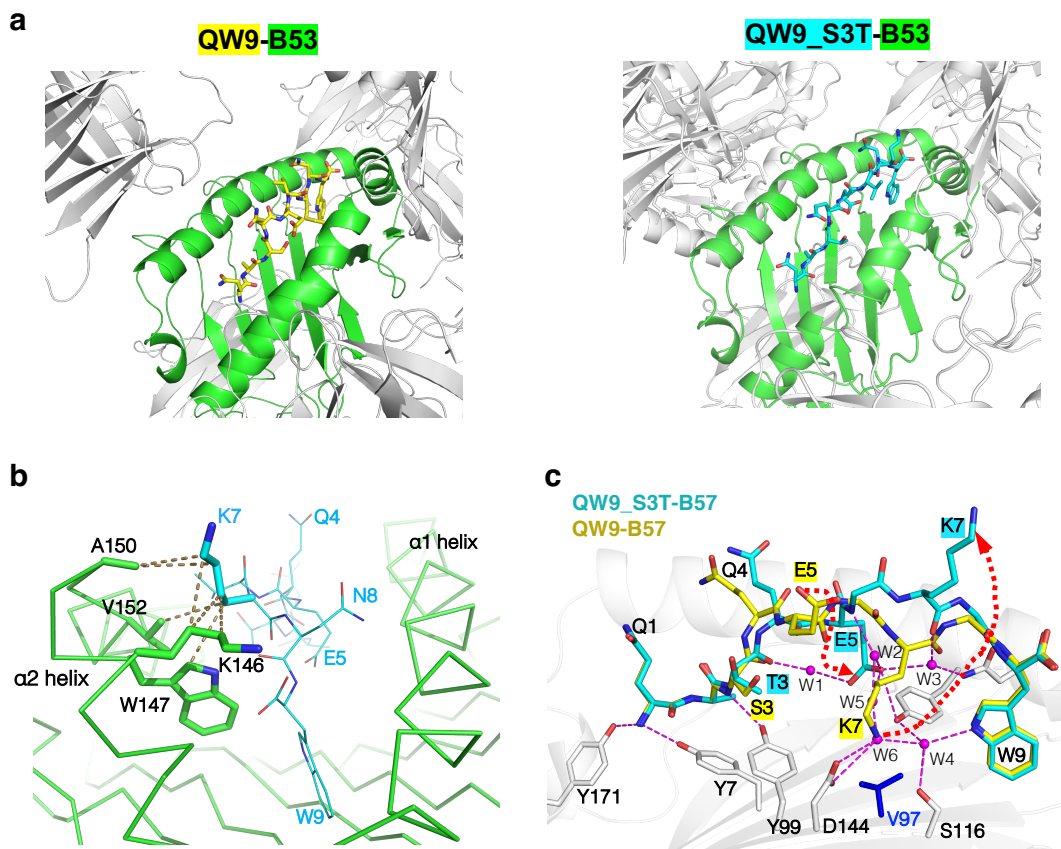

**Supplementary Figure 4. Structural features of QW9 and QW9\_S3T complexed with B53**

**a**, The protein packing in the crystals of QW9-B53 (left panel) and QW9\_S3T-B53 (right panel). The green ribbon in each panel is a representative of the QW9-B53 or QW9\_S3T-B53 molecule in the respective crystal, and grey ribbons are the same protein molecules packing around the antigen binding region of a representative pHLA. Both peptides have no contact with their adjacent molecules. **b**, The stabilizing contacts between the sidechain of K7<sup>QW9\_S3T</sup> (cyan stick) and B53 (green skeleton). The hydrophobic contacts between K7<sup>QW9\_S3T</sup> and B53 are drawn with orange broken lines. **c**, The overlay of QW9\_S3T<sup>B57</sup> (cyan stick) onto QW9<sup>B57</sup> (yellow stick) in the context of the same B57 (white ribbon). Only key hydrogen bonds (magenta broken lines) and water molecules (magenta spheres) involved in the interaction between QW9\_S3T and B57 are shown.

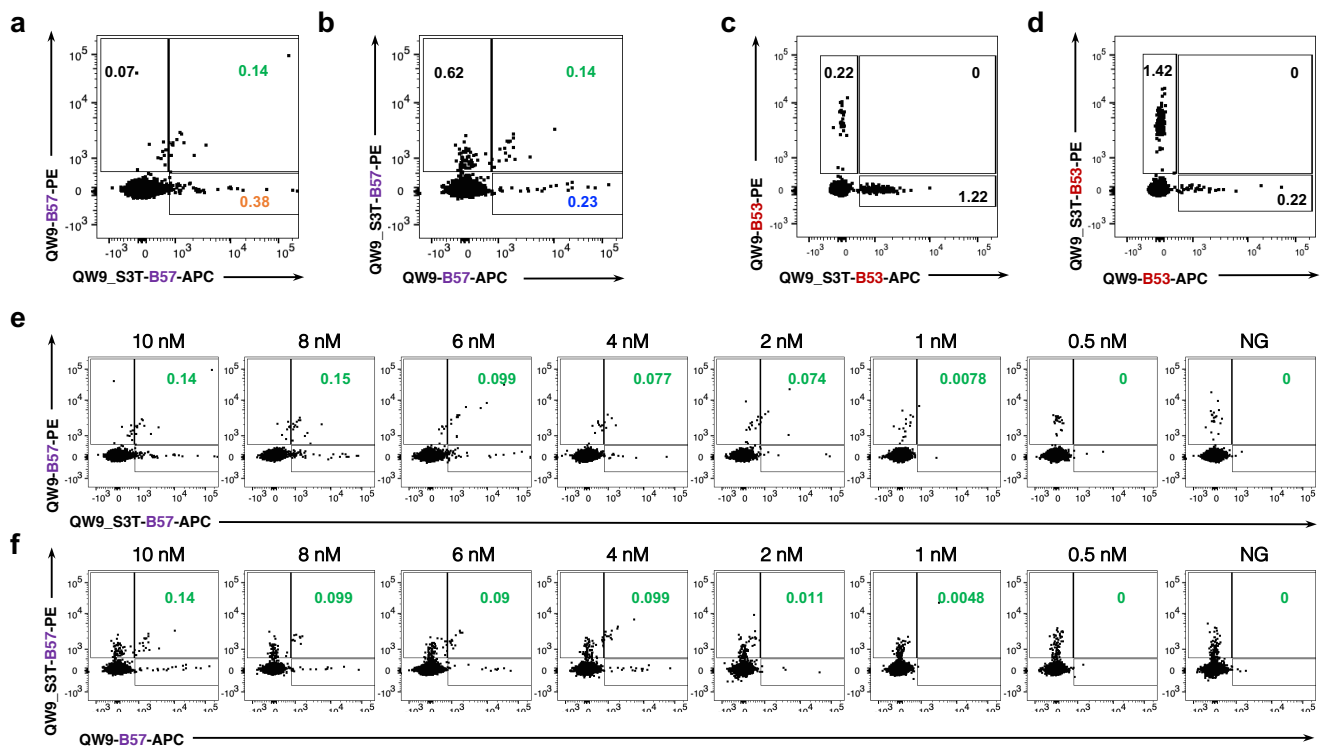

**Supplementary Figure 5. pHLA tetramer titration for comparing cross-reactive TCR binding with QW9-B57 vs. QW9\_S3T-B57**

**a-d**, B57-restricted (**a-b**) or B53-restricted (**c-d**) QW9 responders were stained with fixed concentrations of PE-conjugated pHLA tetramer and titrated concentrations of APC-conjugated pHLA tetramers, as indicated by plot axes. Representative flow plots from the highest staining concentration are shown. **e**, B57<sup>+</sup> PBMCs were stained with fixed concentration (10 nM) of PE-conjugated QW9-B5701 tetramer and titrated concentrations of APC-conjugated QW9\_S3T-B57 tetramers, as indicated by X-axis. **f**, B57<sup>+</sup> PBMCs were stained with fixed concentration (10 nM) of PE-conjugated QW9\_S3T-B57 tetramer and titrated concentrations of APC-conjugated QW9-B57 tetramers, as indicated by X-axis. The duplicate number for each experiment, n=3.

**Supplementary Table 1. Network scores of the individual amino acids of QW9 in gag p24**

| <b>p24 gag (QW9)</b> | <b>Network Score</b> |
|----------------------|----------------------|
| GLN176 (Q1)          | 2.110361193          |
| ALA177 (A2)          | 3.797598535          |
| SER178 (S3)          | -0.950558885         |
| GLN179 (Q4)          | -1.146693637         |
| GLU180 (E5)          | -1.052420466         |
| VAL181 (V6)          | 2.028056393          |
| LYS182 (K7)          | 3.353713836          |
| ASN183 (N8)          | -1.068618976         |
| TRP184 (W9)          | 2.270120659          |

**Supplementary Table 2. Characteristics of the research participants for functional examination**

|               | Participants ID | Yrs Dx to Sample Collection | Age at Sample Collection | Viral Load (RNA copies/ml) | CD4 count (cells/uL) | Gender | Race           | HIV Risk     | HLA                                        |
|---------------|-----------------|-----------------------------|--------------------------|----------------------------|----------------------|--------|----------------|--------------|--------------------------------------------|
| <b>B*5701</b> | 164007          | 23                          | 52                       | <75                        | 1437                 | Female | AA/Hispanic    | IVDU         | A*0101, 0301; B*4102, 5701; Cw*0602, 1202  |
|               | 970489          | 5                           | 30                       | 493                        | 552                  | Male   | Caucasian      | MSM          | A*0201, 3201; B*4001, 5701,; Cw*0501, 0602 |
|               | 900837          | 22                          | 49                       | 355                        | 664                  | Male   | Caucasian      | MSM          | A*1101, 1101; B*1402, 5701; Cw*0602, 0802  |
|               | 542735          | 13                          | 43                       | <75                        | 668                  | Male   | Unknown        | MSM          | A*0201, 3001; B*5301, 5701; Cw*0413, 0602  |
|               | 264095          | 1                           | 52                       | 184                        | 682                  | Male   | Caucasian      | MSM          | A*0301, 0301; B*1402, 5701; Cw*0602, 0801  |
|               | 246734          | 2                           | 65                       | <20                        | 609                  | Male   | Unknown        | Unknown      | A*0301, 3101; B*2705, 5701; Cw*0127, 0602  |
|               | 534694          | 7                           | 59                       | 5450                       | 663                  | Male   | Unknown        | Unknown      | A*0201, 0201; B*2705, 5701; Cw*0102, 0602  |
|               | 923358          | 6                           | 62                       | <20                        | 893                  | Male   | White          | MSM          | A*0101, 0301; B*0702, 5701; Cw*0602, 0702  |
| <b>B*5301</b> | 912103          | 9                           | 37                       | 552                        | 493                  | Male   | White/Hispanic | MSM          | A*3001, 3601; B*4402, 5301; Cw*0401, 0501  |
|               | 443552          | 23                          | 54                       | 48                         | 849                  | Male   | AA             | IVDU         | A*0201, 0201; B*4901, 5301; Cw*0401, 0701  |
|               | 187948          | 1                           | 23                       | <50                        | 1157                 | Female | Hispanic       | Heterosexual | A*6801, 74; B*5301, 5701; Cw*0401, 0602    |
|               | 423060          | 9                           | 50                       | 439                        | 706                  | Male   | AA             | MSM          | A*2301, 2902; B*3102, 5301; Cw*0602, 0602  |
|               | 616147          | 6                           | 40                       | 400                        | 772                  | Male   | Caucasian      | MSM          | A*2301, 6801; B*1801, 5301; Cw*0401, 0701  |
|               | 973241          | 9                           | 50                       | 2940                       | 266                  | Male   | Unknown        | Unknown      | A*3002, 3303; B*4403, 5301; Cw*0401, 0602  |
|               | 330183          | 11                          | 44                       | 3180                       | 1038                 | Male   | Unknown        | Unknown      | A*0201, 6802; B*0702, 5301; Cw*0401, 0702  |

**Supplementary Table 3. Diffraction data and refinement statistics**

| <b>Protein<br/>(PDB code)</b>                       | <b>QW9-<br/>B53<br/>(7R7V)</b>                        | <b>QW9_S3T-<br/>B53<br/>(7R7W)</b>                    | <b>QW9-<br/>B57<br/>(7R7X)</b>                        | <b>QW9_S3T-<br/>B57<br/>(7R7Y)</b>                    | <b>C3<br/>TCR<br/>(7R7Z)</b> | <b>C3 TCR-<br/>QW9-B53<br/>(7R80)</b>                 |
|-----------------------------------------------------|-------------------------------------------------------|-------------------------------------------------------|-------------------------------------------------------|-------------------------------------------------------|------------------------------|-------------------------------------------------------|
| <b>Data collection</b>                              |                                                       |                                                       |                                                       |                                                       |                              |                                                       |
| Space group                                         | <i>P</i> 2 <sub>1</sub> 2 <sub>1</sub> 2 <sub>1</sub> | <i>P</i> 2 <sub>1</sub> 2 <sub>1</sub> 2 <sub>1</sub> | <i>P</i> 2 <sub>1</sub> 2 <sub>1</sub> 2 <sub>1</sub> | <i>P</i> 2 <sub>1</sub> 2 <sub>1</sub> 2 <sub>1</sub> | <i>P</i> 1 2 <sub>1</sub> 1  | <i>P</i> 2 <sub>1</sub> 2 <sub>1</sub> 2 <sub>1</sub> |
| Cell dimensions                                     |                                                       |                                                       |                                                       |                                                       |                              |                                                       |
| <i>a</i> , <i>b</i> , <i>c</i> (Å)                  | 50.6 82.0 109.8                                       | 50.7 82.4 110.4                                       | 69.5 82.6 157.3                                       | 50.3 81.8 109.9                                       | 43.2 59.4 82.7               | 60.31 64.814 220.9                                    |
| $\alpha$ , $\beta$ , $\gamma$ (°)                   | 90 90 90                                              | 90 90 90                                              | 90 90 90                                              | 90 90 90                                              | 90 90.5 90                   | 90 90 90                                              |
| Resolution (Å)                                      | 1.60                                                  | 1.17                                                  | 2.10                                                  | 1.60                                                  | 2.29                         | 2.95                                                  |
| <i>R</i> <sub>merge</sub> (%)                       | 11.6 (110.1)                                          | 4.8 (86.6)                                            | 6.8 (63.8)                                            | 9.5 (65.1)                                            | 11.1 (90.4)                  | 13.8 (129.9)                                          |
| <i>I</i> / $\sigma$                                 | 21.4 (1.7)                                            | 25.5 (1.2)                                            | 17.7 (2.4)                                            | 61.7 (7.9)                                            | 12.0 (1.5)                   | 14.0 (1.3)                                            |
| Completeness (%)                                    | 99.1 (99.8)                                           | 97.6 (95.6)                                           | 99.9 (99.3)                                           | 100 (100)                                             | 98.1 (90.2)                  | 90.2 (90.3)                                           |
| Redundancy                                          | 5.5(5.6)                                              | 5.0(4.2)                                              | 6.3 (6.0)                                             | 18.5 (18.5)                                           | 5.1(2.6)                     | 4.4 (4.0)                                             |
| <b>Refinement</b>                                   |                                                       |                                                       |                                                       |                                                       |                              |                                                       |
| Resolution (Å)                                      | 50.00 -1.60<br>(1.63-1.60)                            | 50.00 - 1.17<br>(1.19 - 1.17)                         | 39.94 - 2.10<br>(2.17 - 2.10)                         | 32.82 - 1.60<br>(1.66 - 1.60)                         | 41.34 - 2.29<br>(2.37 -2.29) | 50.00 - 2.95<br>(3.00 - 2.95)                         |
| No. reflections                                     | 60504 (6032)                                          | 151816 (14712)                                        | 53661 (5270)                                          | 60429 (5868)                                          | 17276 (899)                  | 17414 (1279)                                          |
| <i>R</i> <sub>work</sub> / <i>R</i> <sub>free</sub> | 17.4 (22.7) /<br>19.8 (24.2)                          | 13.2 (25.5) /<br>15.7 (27.3)                          | 18.4 (23.2) /<br>21.9 (27.9)                          | 15.3 (18.3) /<br>18.9 (23.6)                          | 21.5 (28.3) /<br>25.2 (33.7) | 23.2 (30.1) /<br>28.6 (35.9)                          |
| No. atoms                                           | 3618                                                  | 3900                                                  | 6915                                                  | 3779                                                  | 3552                         | 6407                                                  |
| Protein                                             | 3205                                                  | 3268                                                  | 6326                                                  | 3191                                                  | 3447                         | 6258                                                  |
| Ligand/ion                                          | 12                                                    | None                                                  | 16                                                    | 18                                                    | 22                           | None                                                  |
| Water                                               | 401                                                   | 632                                                   | 573                                                   | 570                                                   | 83                           | 149                                                   |
| <i>B</i> -factors                                   | 30.42                                                 | 22.30                                                 | 34.3                                                  | 20.81                                                 | 40.62                        | 94.58                                                 |
| Protein                                             | 29.14                                                 | 18.95                                                 | 33.64                                                 | 18.18                                                 | 40.79                        | 95.13                                                 |
| Ligand/ion                                          | 45.18                                                 | None                                                  | 71.11                                                 | 51.3                                                  | 36.99                        | None                                                  |
| Water                                               | 40.24                                                 | 39.59                                                 | 40.59                                                 | 34.53                                                 | 34.65                        | 71.25                                                 |
| R.m.s. deviations                                   |                                                       |                                                       |                                                       |                                                       |                              |                                                       |
| Bond lengths (Å)                                    | 0.015                                                 | 0.012                                                 | 0.004                                                 | 0.009                                                 | 0.002                        | 0.007                                                 |
| Bond angles (°)                                     | 1.37                                                  | 1.29                                                  | 0.66                                                  | 1.07                                                  | 0.54                         | 1.1                                                   |

\*Number of xtals for each structure should be noted in footnote. \*Values in parentheses are for highest-resolution shell.



**Supplementary Table 4. Buried surface area (BSA) contributed from each component of the C3-QW9-B53 complex**

|              | <b>Loop</b> | <b>BSA (Å<sup>2</sup>)</b> | <b>Contribution</b> | <b>Contribution (Sum)</b> |
|--------------|-------------|----------------------------|---------------------|---------------------------|
| <b>TCR α</b> | CDR1α       | 168.8                      | 17.1%               | 38.7%                     |
|              | CDR2α       | 0.8                        | 0                   |                           |
|              | CDR3α       | 213.2                      | 21.6%               |                           |
| <b>TCR β</b> | CDR1β       | 100.0                      | 10.1%               | 61.3%                     |
|              | CDR2β       | 174.2                      | 17.6%               |                           |
|              | CDR3β       | 330.7                      | 33.6%               |                           |
| <b>MHC</b>   |             | 746.2                      |                     | 75.6%                     |
| <b>QW9</b>   |             | 240.8                      |                     | 24.4%                     |
| <b>Total</b> |             | 1974.7                     |                     |                           |

**Supplementary Table 5. Least-squares superpositions of apo B53 and C3 onto C3-QW9-B53 complex**

| r.m.s.d<br>(Å)     | B*5301     | C3 TCR     |
|--------------------|------------|------------|
| $\alpha 1\alpha 2$ | 0.48(0.88) |            |
| QW9                | 0.19(0.45) |            |
| V $\alpha$         |            | 0.76(1.35) |
| V $\beta$          |            | 0.49(1.12) |
| CDR1 $\alpha$      |            | 1.22(2.15) |
| CDR2 $\alpha$      |            | 0.26(1.26) |
| CDR3 $\alpha$      |            | 0.38(0.59) |
| CDR1 $\beta$       |            | 0.28(1.55) |
| CDR2 $\beta$       |            | 0.18(0.33) |
| CDR3 $\beta$       |            | 0.68(1.94) |
